# Supplementary material for: Trade-off between herbal and allopathic treatments: An ethnopharmacological case study in Rema-kalenga wildlife sanctuary, Bangladesh
Source: PubMed Central journal article supplement (PMC11532247; doi:10.1016/j.heliyon.2024.e39341), 2024-10-12
Supplement: mmc1.pdf [file mmc1.pdf]

## Supplementary data (S1)

**Table S1.1:** Definition of seven categories used to identify Nussbaum's human functional capabilities and explore perceptions of herbal medicine and allopathy.

| Category                             | Definition                                                                                                                                       |
|--------------------------------------|--------------------------------------------------------------------------------------------------------------------------------------------------|
| Affiliation                          | Affiliation is the capability to coexist with others, demonstrate care and empathy towards them, and participate in diverse social interactions. |
| Life                                 | Being able to live to the end of one's life; not dying too soon or before one's life is no longer worth living.                                  |
| Bodily health (BH)                   | Having good health, appropriate nutrition, and a safe place to live                                                                              |
| Practical reasons (PR)               | Being able to develop a vision of what is good and reflect on one's life planning                                                                |
| Species conservation (SC)            | To be able to live in harmony with and concerning the natural environment.                                                                       |
| Play                                 | The ability to laugh, play, and engage in recreational activities.                                                                               |
| Control over one's Environment (COE) | On an equal level with others, owning property and exercising property rights. Ability to function like a human.                                 |

**Table S1.2:** Outcomes and possible outcomes of the relationship between allopathy and herbal users - Allopathy users

| Users     | Capabilities                   | Outcomes                            | Value |
|-----------|--------------------------------|-------------------------------------|-------|
| Allopathy | Affiliation                    | Difficult to administer children    | 7     |
| Allopathy | Affiliation                    | Family tradition                    | 5     |
| Allopathy | Affiliation                    | Possible social network             | 6     |
| Allopathy | Affiliation                    | Uplift social status                | 7     |
| Allopathy | Bodily health                  | Detrimental health effects          | 8     |
| Allopathy | Bodily health                  | Physical and mental health efficacy | 6     |
| Allopathy | Bodily health                  | Sound sleep                         | 5     |
| Allopathy | Control over one's environment | Degree of freedom to choice         | 3     |
| Allopathy | Control over one's environment | Financial burden                    | 7     |
| Allopathy | Life                           | Antimicrobial resistance            | 6     |
| Allopathy | Life                           | Increasing dependence on medication | 5     |
| Allopathy | Life                           | Risk to wrong treatment             | 4     |
| Allopathy | Practical reason               | Easy to use                         | 8     |
| Allopathy | Practical reason               | Low cost                            | 2     |
| Allopathy | Practical reason               | Quick recovery                      | 7     |
| Herbal    | Affiliation                    | Cultural beliefs and tradition      | 4     |
| Herbal    | Affiliation                    | Difficult to administer children    | 3     |
| Herbal    | Affiliation                    | Family tradition                    | 8     |
| Herbal    | Affiliation                    | Possible social network             | 2     |
| Herbal    | Bodily health                  | Physical and mental health efficacy | 4     |
| Herbal    | Bodily health                  | Sound sleep                         | 2     |
| Herbal    | Control over one's environment | Degree of freedom to choice         | 3     |
| Herbal    | Control over one's environment | Own the products                    | 10    |

|        |                  |                                    |   |
|--------|------------------|------------------------------------|---|
| Herbal | Life             | Risk to wrong treatment            | 2 |
| Herbal | Play             | Easy and fun by nursing and caring | 5 |
| Herbal | Practical reason | Easy to use                        | 1 |
| Herbal | Practical reason | Low cost                           | 6 |
| Herbal | Practical reason | Quick recovery                     | 2 |
| Herbal | Conserve Species | Enrich biodiversity                | 8 |
| Herbal | Conserve Species | Protect rare and endemic species   | 4 |

**Table S1.3:** Outcomes and possible outcomes of the relationship between allopathy and herbal users - Herbal users

| Users     | Capabilities                   | Outcomes                            | Value |
|-----------|--------------------------------|-------------------------------------|-------|
| Allopathy | Affiliation                    | Difficult to administer children    | 6     |
| Allopathy | Affiliation                    | Uplift social status                | 6     |
| Allopathy | Bodily health                  | Detrimental health effects          | 8     |
| Allopathy | Bodily health                  | Sound sleep                         | 2     |
| Allopathy | Control over one's environment | Financial burden                    | 9     |
| Allopathy | Life                           | Antimicrobial resistance            | 6     |
| Allopathy | Life                           | Increasing dependence on medication | 7     |
| Allopathy | Life                           | Risk to wrong treatment             | 5     |
| Allopathy | Practical reason               | Easy to use                         | 4     |
| Allopathy | Practical reason               | Quick recovery                      | 4     |
| Herbal    | Affiliation                    | Cultural beliefs and tradition      | 7     |
| Herbal    | Affiliation                    | Family tradition                    | 5     |
| Herbal    | Affiliation                    | Possible social network             | 4     |
| Herbal    | Bodily health                  | Detrimental health effects          | 3     |
| Herbal    | Bodily health                  | Physical and mental health efficacy | 7     |
| Herbal    | Bodily health                  | Sound sleep                         | 5     |
| Herbal    | Control over one's environment | Degree of freedom to choice         | 1     |
| Herbal    | Control over one's environment | Own the products                    | 8     |
| Herbal    | Life                           | Risk to wrong treatment             | 3     |
| Herbal    | Play                           | Easy and fun by nursing and caring  | 7     |
| Herbal    | Practical reason               | Abundance of raw materials          | 8     |
| Herbal    | Practical reason               | Easy to use                         | 4     |
| Herbal    | Practical reason               | Low cost                            | 6     |
| Herbal    | Practical reason               | Quick recovery                      | 2     |
| Herbal    | Conserve Species               | Enrich biodiversity                 | 7     |
| Herbal    | Conserve Species               | Protect rare and endemic species    | 5     |

**Table S1.4:** Medicinal plants with their uses, used parts according to survey. Where F, D, W,C, B refers to fresh , dry, wild, cultivated, both.

| Local Name                                    | Scientific name             | Use parts   | Type | Status | Aditive      | Principal Use                                                                                                                                                                                                                                                                                                            | Preparation Methods      | Seasonal availability |
|-----------------------------------------------|-----------------------------|-------------|------|--------|--------------|--------------------------------------------------------------------------------------------------------------------------------------------------------------------------------------------------------------------------------------------------------------------------------------------------------------------------|--------------------------|-----------------------|
| <b>Arjun</b>                                  | <i>Terminalia arjuna</i>    | Bark        | D    | W,C, B | Milk, Honey  | Used for detoxifying the blood, urinary infections, lung illness, and tonic for bone fracture patients. It is also used for maintaining the female body's hormone cycle and relieving excess bleeding in menorrhagia.                                                                                                    | Powder                   | All                   |
| <b>Bunim, Chirota</b>                         | <i>Swertia Chirata</i>      | Whole plant | F    | W,C    | No           | Used for removing toxin from the body, heartburn, piles treatment, fever, stomachache, expelling out helminths or internal parasites from the body, itching, asthma                                                                                                                                                      | Decoction                | All                   |
| <b>Neem</b>                                   | <i>Azadirachta indica</i>   | Leaf, Bark  | F,D  | C,W    | Honey        | Skin Disease (juice of leaves with honey, take a bath with Neem leaves boiled water); wounds/Ulcer ( leaves paste on the affected part); loss of appetite, intestinal wounds (leaves decoction to eat empty stomach ); Dandruff/ringworm; Diabetes (dry leaves /fruit power water empty stomach helps in initial stages) | Powder, Decoction, Paste | All                   |
| <b>Baheda, Bahera</b>                         | <i>Terminalia bellerica</i> | Fruit       | F,D  | W,C, B | Honey, Lemon | Useful for dysentery, lotion for sore eyes, treat of respiratory conditions, including respiratory tract infections, cough, and sore throat; high cholesterol and digestive disorders                                                                                                                                    |                          | All                   |
| <b>Tulshi</b>                                 | <i>Ocimum tenuiflorum</i>   | Leaf        | F    | C      | Honey, Oil   | Used for treating cough, asthma, fever, dysentery, and indigestion.                                                                                                                                                                                                                                                      | Juice, Paste, Decoction  | All                   |
| <b>Kumari, Aloe-vera</b>                      | <i>Aloe vera</i>            | Leaf        | F    | C,B    | Honey        | Mostly used for burns and minor cuts, skin cancer treatment prevents arthritis by maintaining healthy joints and muscles.                                                                                                                                                                                                | Mash                     | All                   |
| <b>Adamoni pata, Thankuni pata, Gotu-shak</b> | <i>Centella asiatica</i>    | Leaf, Root  | F    | W,C, B | No           | Used for blood purification, fever, alleviating wound pains, reducing inflammations, controlling blood pressure                                                                                                                                                                                                          | Decoction                | All                   |
| <b>Bon chukanda</b>                           | <i>Cassia tora</i>          | Seed        | D    | W      | No           | Used for ringworm infection                                                                                                                                                                                                                                                                                              | Paste                    |                       |
| <b>Daiya, Ulat kambal</b>                     | <i>Abroma augusta</i>       | Stem bark   | D    | W      | Honey        | To treat abnormal vaginal discharges, absence of menstrual periods that causes abdominal pains, sleeping disorders, fever, weakness, and hypertension                                                                                                                                                                    | Paste                    | All                   |
| <b>Haritaki</b>                               | <i>Terminalia chebula</i>   | Fruit, Leaf | F,D  | W,B, C | Honey, Lemon | Used for treating respiratory tract infections, cough, sore throat, vaginal infections, hair loss, intestinal worms, dysentery, high cholesterol, and digestive disorders                                                                                                                                                | Powder, Mash             | All                   |

|                                               |                             |               |      |        |                   |                                                                                                                                                                                                                                                                                                                                                                                       |                          |                  |
|-----------------------------------------------|-----------------------------|---------------|------|--------|-------------------|---------------------------------------------------------------------------------------------------------------------------------------------------------------------------------------------------------------------------------------------------------------------------------------------------------------------------------------------------------------------------------------|--------------------------|------------------|
| <b>Hatishur</b>                               | <i>Heliotropium indicum</i> | Leaf          | F    | W      | No                | Leaves paste for bone fracture, soreness, tumor, pain, and insect bite.                                                                                                                                                                                                                                                                                                               | Paste                    | All              |
| <b>Basak</b>                                  | <i>Adhatoda Vasica</i>      | Leaf          | F    | C,B    | Honey             | Asthma, Cough, Fever, Cold. Leaves sap is extracted from leaves paste and eaten with honey                                                                                                                                                                                                                                                                                            | Paste                    |                  |
| <b>Amloki</b>                                 | <i>Phyllanthus emblica</i>  | Fruit, Leaf   | F,D  | W,C, B | Honey, Lemon, Oil | Stimulate hair growth, reduce fever, purify the blood, reduce cough, alleviate asthma, strengthen the heart, benefit the eyes                                                                                                                                                                                                                                                         | Decoction, Powder, Paste |                  |
| <b>Rosun</b>                                  | <i>Allium sativum</i>       | Fruit         | F,D  | C,B    | No                | Headache, cold, cough                                                                                                                                                                                                                                                                                                                                                                 | Paste, Powder            | Winter           |
| <b>Holud</b>                                  | <i>Curcuma longa</i>        | Rhizomes      | F    | C,B    | No                | Used for treating itches, ringworm of <i>Curcuma longa</i> rhizomes paste is applied to affected areas of skin.                                                                                                                                                                                                                                                                       | Paste                    | January to March |
| <b>Satamuli</b>                               | <i>Asparagus racemosus</i>  | Root          | F,D  | W,C    | Milk, Honey       | Maintaining the female reproductive system, treating the male low-sperm problems, enhance the baby milk of the mother, typhoid, gastric                                                                                                                                                                                                                                               | Juice                    | All              |
| <b>Bel</b>                                    | <i>Aegle marmelos</i>       | Fruit, Leaves | F    | W,C    | Honey             | The unripe fruit is burned slightly over a fire and then taken for indigestion. Leaves juice with honey used for fever.                                                                                                                                                                                                                                                               | Juice                    | All              |
| <b>Dumur</b>                                  | <i>Ficus hispida</i>        | Bark, Latex   | F    | W      | No                | Decoction of bark used for fever, fruits latex used for treating ringworm                                                                                                                                                                                                                                                                                                             | Decoction                | All              |
| <b>Jambushak, Changhang-folik, Ushni-shak</b> | <i>Acmella oleracea</i>     | Root, Flower  | D    | W      | No                | To treat stomatitis, inflamed and swollen skin, salivary glands that don't make enough saliva                                                                                                                                                                                                                                                                                         | Powder                   | All              |
| <b>Nirgandi, Nishinda</b>                     | <i>Vitex negundo</i>        | Leaf          | F    | W      | No                | Leaf paste for joint pain, leaf decoction for cough, asthma; fruit powder for nasal polyps                                                                                                                                                                                                                                                                                            | Powder, Decoction        | All              |
| <b>Gondhobadali, Padra Pata</b>               | <i>Paederia foetida</i>     | Leaf          | F    | W,C, B | No                | Used for treating piles, and diarrhea                                                                                                                                                                                                                                                                                                                                                 | Mash, Juice              | All              |
| <b>Kharbas, Kalman, Sarakao</b>               | <i>Typhonium trilobatum</i> | Rhizome       | Both | W,C, B | No                | The rhizome is used for vomiting, cough, asthma, headache, gastric ulcer, abscess, and snake bite. The boiled corms are also eaten with bananas to treat stomach problems. These plant parts may be toxic in fresh conditions and, if eaten, sometimes make the mouth, tongue, and throat feel as if hundreds of small needles. However, it can be safely eaten by cooking or drying. | Mash, Powder             | Monsoon          |
| <b>Shadashimul</b>                            | <i>Ceiba speciosa</i>       | Fruit         | D    | W,C    | No                | Used for hypertension and respiratory diseases                                                                                                                                                                                                                                                                                                                                        | Powder                   | February-may     |
| <b>Kalo jira</b>                              | <i>Nigella sativa</i>       | Seed          | D,F  | C,B    | Honey             | Used for curing skin-related disorders, painful menstruation, indigestion                                                                                                                                                                                                                                                                                                             | Fresh                    |                  |

|                                                    |                             |                    |     |      |       |                                                                                                                                                                                                                |                   |                |
|----------------------------------------------------|-----------------------------|--------------------|-----|------|-------|----------------------------------------------------------------------------------------------------------------------------------------------------------------------------------------------------------------|-------------------|----------------|
| <b>Uzari, Refugeelota</b>                          | <i>Mikania scandens</i>     | Leaf               | F   | W    | No    | This plant extract is being traditionally used as an anti-bacterial, anti-inflammatory agent and for diabetes management.                                                                                      | Paste             | All            |
| <b>Akon, Muruhur pang, Moruporu</b>                | <i>Calotropis procera</i>   | Leaf               | F   | W,C  | No    | Fomentation in bone fracture,rheumatism (14 days); decoction of leaves for diabetes and malaria(100ml); poultice of leaves applied for treating filariasis, skin inflammations                                 | Decoction         | All            |
| <b>Sajina</b>                                      | <i>Moringa oleifera</i>     | Leaf               | F   | W,C  | No    | Leaves juice is taken every morning and evening for pimples, backaches, dysmenorrhea                                                                                                                           | Decoction         | All            |
| <b>Khantakuri , Kan-chupol, Kata-shak, Bualing</b> | <i>Amaranthus spinosus</i>  | Leaf, stem         | F   | W, C | No    | Leaves and stem juice used for chicken pox, abdominal pain,dysuria, fevers                                                                                                                                     | Infusion; Mash    | All            |
| <b>Luthingpat a</b>                                | <i>Dracaena trifasciata</i> | Leaf               | F   | W,C  | NO    | Used for ear pain, and swellings                                                                                                                                                                               | Paste             | All            |
| <b>Kumri, Kumarilota</b>                           | <i>Smilax macrophylla</i>   | Stem               | F   | W    | No    | Crushed stems are mixed with water for weakness.                                                                                                                                                               | Paste             | All            |
| <b>Gol morich</b>                                  | <i>Piper nigrum</i>         | Seed               | D   | C,B  | No    | Fruit powder paste is applied to improve blood circulation, cough, asthma                                                                                                                                      | Powder, Oil       | November-March |
| <b>Goksura, Gokur kata</b>                         | <i>Tribulus terrestris</i>  | Thorne             | D   | W    | No    | Improve semen quality, obesity treatment, urinary bladder infection, sex booster                                                                                                                               | Powder            | All            |
| <b>Dewa</b>                                        | <i>Artocarpus lakoocha</i>  | Leaf               | F   | W    | No    | Skin diseases and asthma                                                                                                                                                                                       | Paste             | All            |
| <b>Balikori, Methi</b>                             | <i>Sida cordifolia</i>      | Leaf, Root         | F,D | W,C  | No    | To reduce joint pain or arthritis pain, low sperm count, and weakness, leaf juice is taken on an empty stomach to rejuvenate the urinary system, and root bark powder is mixed with water.                     | Decoction, Powder |                |
| <b>Gab</b>                                         | <i>Diospyros malabarica</i> | Fruit              | F   | W    | No    | Beneficial for treating diarrhea and dysentery                                                                                                                                                                 | Infusion          | February-June  |
| <b>Heez Gaach, Hing, Hitla</b>                     | <i>Ferula asafoetida</i>    | Stem, Resign, Leaf | F   | W    | No    | This plant treats whooping cough, abdomen pain, and intestinal parasites.                                                                                                                                      | Juice,Paste       |                |
| <b>Songkhok, Apang, Upatlengra, Chikring-lu</b>    | <i>Achyranthes aspera</i>   | Leaf, stem, root   | F   | W, C | Sugar | The root is taken for jaundice and respiratory problems; Leaves are used for eczema. Root paste is applied to poisonous animal bites. Root juice is applied upon the tonsil area during tonsillitis and Asthma | Infusion; Mash    | All            |
| <b>Sonamukhi</b>                                   | <i>Cassia angustifolia</i>  | Leaf, Root         | F,D | W,C  | Water | Powdered dried leaves used with hot water for treating abdominal distention, leaf paste used for skin diseases, helps with blood purification                                                                  | Powder, Paste     | All            |

|                             |                                  |                     |     |     |              |                                                                                                                                                                                                             |                   |                 |
|-----------------------------|----------------------------------|---------------------|-----|-----|--------------|-------------------------------------------------------------------------------------------------------------------------------------------------------------------------------------------------------------|-------------------|-----------------|
| <b>Bon tamak</b>            | <i>Nicotiana plumbaginifolia</i> | Root                | F,D | W,C | Black peeper | For piles problems, root paste is blended with black pepper (3:1) and taken on an empty stomach; beef should not be eaten during this period.                                                               | Paste             | All             |
| <b>Harjora</b>              | <i>Echinopsis pachanoi</i>       | Leaf                | F   | W   | No           | Used for snake bites, general pain                                                                                                                                                                          | Paste             | All             |
| <b>Dongkolosh</b>           | <i>Crinum asiaticum</i>          | Leaf, Rhizome       | F   | W   | Oil          | Heated leaf extract is used to treat earache, and rhizome powder is mixed with mustered oil and applied to joint pain and snake bites.                                                                      | Decoction, Powder | All             |
| <b>Agun pata</b>            | <i>Plumbago indica</i>           | Leaf                | F   | C,W | Oil          | Pain remover: leaves are fried in oil and rubbed on the painful areas.                                                                                                                                      | Paste             | All             |
| <b>Jamalgota</b>            | <i>Jatropha curcas</i>           | Latex               | F   | W   | No           | Used for skin diseases and muscle pain                                                                                                                                                                      | Juice             | All             |
| <b>Mandar gach</b>          | <i>Erythrina variegata</i>       | Bark                | F   | W   | Oil          | For eye itching problems bark paste with mustard oil is gently warm and then put on the eyes.                                                                                                               | Paste             | All             |
| <b>Folok, Ghetu pata</b>    | <i>Clerodendrum viscosum</i>     | Leaf                | F   | W   | No           | Used for treating stomach pain, fever, skin diseases, jaundice and acidity                                                                                                                                  | Paste             | All             |
| <b>Oudal,Dieng star</b>     | <i>Sterculia villosa</i>         | Leaf, Bark, Root    | F   | W   | No           | Bark decoction is used for constipation, and bark juice with <i>Pongamia pinnata</i> oil is applied to treat ulcers. Root tonic is made into a paste with honey and given to children with blood dysentery. | Decoction, Paste  | All             |
| <b>Pipil</b>                | <i>Piper longum</i>              | Leaf                | F   | W   | No           | Leaves paste with water used for hypertension                                                                                                                                                               | Paste             |                 |
| <b>Bon hina, Mishri</b>     | <i>Scoparia dulcis</i>           | Root                | F,D | W   | Honey        | For frequent urination problems in children, leaves along with betel leaves are left overnight mixed with honey and water. They are also used to treat fever and digestive problems.                        | Decoction, Juice  |                 |
| <b>BonDerosh</b>            | <i>Abelmoschus moschatus</i>     | Root                | F,D | W   | No           | Used for leg swelling                                                                                                                                                                                       | Mash              | January to June |
| <b>Harinpaya, Man kochu</b> | <i>Alocasia indica</i>           | Rhizome, Stem, Leaf | F,D | W,C | No           | Leaf paste is used to control bleeding and reduce swelling; fresh juice of leaves is mildly heated and used for treating earache.                                                                           | Paste, Juice      |                 |
| <b>Turi pata</b>            | <i>Pouzolzia zeylanica</i>       | Leaf                | F   | W   | No           | Leaves pastes are applied for skin infections.                                                                                                                                                              | Paste             |                 |
