# Supplementary material for: Trade-off between herbal and allopathic treatments: An ethnopharmacological case study in Rema-kalenga wildlife sanctuary, Bangladesh
Source: PubMed Central journal article supplement (PMC11532247; doi:10.1016/j.heliyon.2024.e39341), 2024-10-12
Supplement: mmc2.pdf [file mmc2.pdf]

## Social Survey Question for Medicinal plants

Village Name:

|           |            |            |
|-----------|------------|------------|
| Latitude: | Longitude: | Elevation: |
|-----------|------------|------------|

### Part-01

01. Age of the Respondent?

02. Respondent profession?

03. Respondent gender a) Male b) Female

04. Community name

05. Educational qualification (ISCED level, 2011):

06. Total family member

07. How frequently have you used herbal treatment?

- a) always b) sometimes c) hardly

08. Years of experience using medicinal plants

09. Years of experience as a practitioner a) 1-3 b) 3-6 c) 6-9 d) up to 10

10. Regular income a) Yes b) No

11. What kinds of treatment do you prefer for your infant?

12. The reasons behind preference to use medicinal plants

- a) Maintain overall health b) Easily available locally c) Free from side effects  
d) Low-cost e) Family tradition f) More effective

13. Source of advice to use medicinal plants

- a) Family b) Educators c) Friends d) Books e) Media f) Health care professionals

14. Have you cultivated medicinal plants? a) Yes b) No

15. If Yes, Please mention the names

16. Do you sell medicinal plants? a) Yes b) No

17.

|                                                                             |                                                    |
|-----------------------------------------------------------------------------|----------------------------------------------------|
| Are you a beneficiary member of social forestry?                            | <input type="radio"/> Yes <input type="radio"/> No |
| Has there autonomy and compensation system?                                 | <input type="radio"/> Yes <input type="radio"/> No |
| Do you have access to the forest for medicinal plant collection?            | <input type="radio"/> Yes <input type="radio"/> No |
| Is the forest rich in terms of resources and biodiversity?                  | <input type="radio"/> Yes <input type="radio"/> No |
| Do you use this forest for your recreation purpose?                         | <input type="radio"/> Yes <input type="radio"/> No |
| Do medicinal plants incorporate with forest policy?                         | <input type="radio"/> Yes <input type="radio"/> No |
| Is local forest attitude favorable for MP collection?                       | <input type="radio"/> Yes <input type="radio"/> No |
| How long do you have to travel when you need to collect MP from the forest? | <input type="radio"/> Yes <input type="radio"/> No |

18. How much you earn in a day and what quantity you sell when you sell?

\_\_\_\_\_ Name \_\_\_\_\_ tk. \_\_\_\_\_ Kg.  
 \_\_\_\_\_ Name \_\_\_\_\_ tk. \_\_\_\_\_ Kg.  
 \_\_\_\_\_ Name \_\_\_\_\_ tk. \_\_\_\_\_ Kg.  
 \_\_\_\_\_ Name \_\_\_\_\_ tk. \_\_\_\_\_ Kg.

19. From where do you collect medicinal plants:

- a) Forest b) Home garden c) Road side d) Neighbor e) Market f) Korbiraj (herbal practitioners)

20. What are the challenges of medicinal plants collection?

- a) Too steep and/or rocky e) Nature conservation i) Stand too young  
 b) Inaccessible f) Require a lot of time j) Other reasons  
 c) Too wet/moist g) Lack of time  
 d) Not profitable h) No access path

20. Are you satisfied with the supply /availability of medicinal plants in your area? a) High b) Low c) Medium d) Don't know

21. Do you think the medicinal plant has medicinal value? a) High b) Low c) Medium d) Don't know

### Part-02

01. Do you use medicinal plants? a) Yes b) No

02. Do you believe the medicinal plant has the potential value of curing diseases?

| ISCED 1997                                                                            | ISCED 2011                                                                                                     |
|---------------------------------------------------------------------------------------|----------------------------------------------------------------------------------------------------------------|
|                                                                                       | <b>0 Early childhood education</b>                                                                             |
|                                                                                       | <b>01 Early childhood educational development</b><br><small>(designed for children aged under 3 years)</small> |
| <b>0 Pre-primary</b><br><small>(designed for children aged 3 years and above)</small> | <b>02 Pre-primary</b><br><small>(designed for children aged 3 years and above)</small>                         |
| <b>1 Primary</b><br><small>(or 1st stage of basic education)</small>                  | <b>1 Primary</b>                                                                                               |
| <b>2 Lower secondary</b><br><small>(or 2nd stage of basic education)</small>          | <b>2 Lower secondary</b>                                                                                       |
| <b>3 Upper secondary</b>                                                              | <b>3 Upper secondary</b>                                                                                       |
| <b>4 Post-secondary non-tertiary</b>                                                  | <b>4 Post-secondary non-tertiary</b>                                                                           |
| <b>5 First stage of tertiary</b>                                                      | <b>5 Short cycle tertiary</b>                                                                                  |
|                                                                                       | <b>6 Bachelor's or equivalent level</b>                                                                        |
|                                                                                       | <b>7 Master's or equivalent level</b>                                                                          |
| <b>6 Second stage of tertiary</b>                                                     | <b>8 Doctoral or equivalent level</b>                                                                          |



|                                    |  |  |  |  |  |  |  |  |  |
|------------------------------------|--|--|--|--|--|--|--|--|--|
| Burning for adults and child       |  |  |  |  |  |  |  |  |  |
| Chicken fox                        |  |  |  |  |  |  |  |  |  |
| Bone fracture (adults and infants) |  |  |  |  |  |  |  |  |  |
| Acne, Spot in face                 |  |  |  |  |  |  |  |  |  |
| Fatigue, weakness                  |  |  |  |  |  |  |  |  |  |
| Malaria                            |  |  |  |  |  |  |  |  |  |
| Dengue                             |  |  |  |  |  |  |  |  |  |
| Corona virus                       |  |  |  |  |  |  |  |  |  |
| Cancer                             |  |  |  |  |  |  |  |  |  |
| Arthritis (Bater batha)            |  |  |  |  |  |  |  |  |  |
| Faint (sense less)                 |  |  |  |  |  |  |  |  |  |
| Numbing                            |  |  |  |  |  |  |  |  |  |
| Instant energy, heart supplement   |  |  |  |  |  |  |  |  |  |
| Blood disease/purification         |  |  |  |  |  |  |  |  |  |
| Vermes                             |  |  |  |  |  |  |  |  |  |
|                                    |  |  |  |  |  |  |  |  |  |

### Part-03

#### Allopathy user/ Herbal user/ Homeopathy user

| Which one do you use from your cultural belief and tradition?          | Herbal                                                                 | Allopathy                                                              | Homeopathy                                                             |
|------------------------------------------------------------------------|------------------------------------------------------------------------|------------------------------------------------------------------------|------------------------------------------------------------------------|
| Which one do you use because of the family trend?                      | <input checked="" type="radio"/> Enabler <input type="radio"/> Barrier | <input checked="" type="radio"/> Enabler <input type="radio"/> Barrier | <input checked="" type="radio"/> Enabler <input type="radio"/> Barrier |
| Which one is helpful to expand your social network?                    | <input checked="" type="radio"/> Enabler <input type="radio"/> Barrier | <input checked="" type="radio"/> Enabler <input type="radio"/> Barrier | <input checked="" type="radio"/> Enabler <input type="radio"/> Barrier |
| In which case do you face difficulties in administering your children? | <input checked="" type="radio"/> Enabler <input type="radio"/> Barrier | <input checked="" type="radio"/> Enabler <input type="radio"/> Barrier | <input checked="" type="radio"/> Enabler <input type="radio"/> Barrier |
| Which has detrimental health effects?                                  | <input checked="" type="radio"/> Enabler <input type="radio"/> Barrier | <input checked="" type="radio"/> Enabler <input type="radio"/> Barrier | <input checked="" type="radio"/> Enabler <input type="radio"/> Barrier |
| Has it improved physical and mental health efficiency?                 | <input checked="" type="radio"/> Enabler <input type="radio"/> Barrier | <input checked="" type="radio"/> Enabler <input type="radio"/> Barrier | <input checked="" type="radio"/> Enabler <input type="radio"/> Barrier |
| Has it helpful for relaxation?                                         | <input checked="" type="radio"/> Enabler <input type="radio"/> Barrier | <input checked="" type="radio"/> Enabler <input type="radio"/> Barrier | <input checked="" type="radio"/> Enabler <input type="radio"/> Barrier |
| Has it helpful for apatite?                                            | <input checked="" type="radio"/> Enabler <input type="radio"/> Barrier | <input checked="" type="radio"/> Enabler <input type="radio"/> Barrier | <input checked="" type="radio"/> Enabler <input type="radio"/> Barrier |
| Has it helpful for sound sleep?                                        | <input checked="" type="radio"/> Enabler <input type="radio"/> Barrier | <input checked="" type="radio"/> Enabler <input type="radio"/> Barrier | <input checked="" type="radio"/> Enabler <input type="radio"/> Barrier |
| Financial burden                                                       | <input checked="" type="radio"/> Enabler <input type="radio"/> Barrier | <input checked="" type="radio"/> Enabler <input type="radio"/> Barrier | <input checked="" type="radio"/> Enabler <input type="radio"/> Barrier |
| Degree of freedom to decide                                            | <input checked="" type="radio"/> Enabler <input type="radio"/> Barrier | <input checked="" type="radio"/> Enabler <input type="radio"/> Barrier | <input checked="" type="radio"/> Enabler <input type="radio"/> Barrier |
| Own the product                                                        | <input checked="" type="radio"/> Enabler <input type="radio"/> Barrier | <input checked="" type="radio"/> Enabler <input type="radio"/> Barrier | <input checked="" type="radio"/> Enabler <input type="radio"/> Barrier |
| Risk to wrong treatment                                                | <input checked="" type="radio"/> Enabler <input type="radio"/> Barrier | <input checked="" type="radio"/> Enabler <input type="radio"/> Barrier | <input checked="" type="radio"/> Enabler <input type="radio"/> Barrier |
| Increasing dependency on medication                                    | <input checked="" type="radio"/> Enabler <input type="radio"/> Barrier | <input checked="" type="radio"/> Enabler <input type="radio"/> Barrier | <input checked="" type="radio"/> Enabler <input type="radio"/> Barrier |
| Risk to wrong treatment                                                | <input checked="" type="radio"/> Enabler <input type="radio"/> Barrier | <input checked="" type="radio"/> Enabler <input type="radio"/> Barrier | <input checked="" type="radio"/> Enabler <input type="radio"/> Barrier |
| Resistant to microbial infestation treatment                           | <input checked="" type="radio"/> Enabler <input type="radio"/> Barrier | <input checked="" type="radio"/> Enabler <input type="radio"/> Barrier | <input checked="" type="radio"/> Enabler <input type="radio"/> Barrier |
| Rare and endangered spp conservation                                   | <input checked="" type="radio"/> Enabler <input type="radio"/> Barrier | <input checked="" type="radio"/> Enabler <input type="radio"/> Barrier | <input checked="" type="radio"/> Enabler <input type="radio"/> Barrier |
| Enrich biodiversity                                                    | <input checked="" type="radio"/> Enabler <input type="radio"/> Barrier | <input checked="" type="radio"/> Enabler <input type="radio"/> Barrier | <input checked="" type="radio"/> Enabler <input type="radio"/> Barrier |
| Enjoy-fun with full nursing and caring                                 | <input checked="" type="radio"/> Enabler <input type="radio"/> Barrier | <input checked="" type="radio"/> Enabler <input type="radio"/> Barrier | <input checked="" type="radio"/> Enabler <input type="radio"/> Barrier |
| Easy to prepare                                                        | <input checked="" type="radio"/> Enabler <input type="radio"/> Barrier | <input checked="" type="radio"/> Enabler <input type="radio"/> Barrier | <input checked="" type="radio"/> Enabler <input type="radio"/> Barrier |
| Abundance                                                              | <input checked="" type="radio"/> Enabler <input type="radio"/> Barrier | <input checked="" type="radio"/> Enabler <input type="radio"/> Barrier | <input checked="" type="radio"/> Enabler <input type="radio"/> Barrier |
| Low cost                                                               | <input checked="" type="radio"/> Enabler <input type="radio"/> Barrier | <input checked="" type="radio"/> Enabler <input type="radio"/> Barrier | <input checked="" type="radio"/> Enabler <input type="radio"/> Barrier |
| Quick recovery                                                         | <input checked="" type="radio"/> Enabler <input type="radio"/> Barrier | <input checked="" type="radio"/> Enabler <input type="radio"/> Barrier | <input checked="" type="radio"/> Enabler <input type="radio"/> Barrier |
| Social taboo                                                           | <input checked="" type="radio"/> Enabler <input type="radio"/> Barrier | <input checked="" type="radio"/> Enabler <input type="radio"/> Barrier | <input checked="" type="radio"/> Enabler <input type="radio"/> Barrier |
| Unpleasant experience                                                  | <input checked="" type="radio"/> Enabler <input type="radio"/> Barrier | <input checked="" type="radio"/> Enabler <input type="radio"/> Barrier | <input checked="" type="radio"/> Enabler <input type="radio"/> Barrier |
| Frightening                                                            | <input checked="" type="radio"/> Enabler <input type="radio"/> Barrier | <input checked="" type="radio"/> Enabler <input type="radio"/> Barrier | <input checked="" type="radio"/> Enabler <input type="radio"/> Barrier |

#### For SWOT

|                                                                                                        |                                                                                |
|--------------------------------------------------------------------------------------------------------|--------------------------------------------------------------------------------|
| The existence of deep cultural and historical roots helps you to know about herbal medicine?           | <input type="radio"/> Yes <input type="radio"/> No                             |
| State policy and union Governments help/promote medicinal and aromatic plants cultivation?             | <input type="radio"/> Yes <input type="radio"/> No                             |
| Are medicinal plants available in your surroundings?                                                   | <input type="radio"/> Yes <input type="radio"/> No                             |
| Do you think natural resources are facing over-exploitation from their wild habitats?                  | <input type="radio"/> Yes <input type="radio"/> No                             |
| Have you aware of information on international demand and supply?                                      | <input type="radio"/> Yes <input type="radio"/> No                             |
| Are you willing to plant MP? (Poor response from the farmers' sector for medicinal plants cultivation) | <input type="radio"/> Yes <input type="radio"/> No                             |
| Doses medicinal plant helps to employment generation?                                                  | <input type="radio"/> Yes <input type="radio"/> No                             |
| Is it easy to prepare?                                                                                 | <input type="radio"/> Yes <input type="radio"/> No                             |
| What about the side effects of the Medicinal plant?                                                    | <input type="radio"/> High <input type="radio"/> Low <input type="radio"/> Med |
| What about the cost of herbal medicine?                                                                | <input type="radio"/> High <input type="radio"/> Low <input type="radio"/> Med |
| Do you think the use of herbal medicine may hamper your social status?                                 | <input type="radio"/> Yes <input type="radio"/> No                             |
| Do you have technical knowledge about                                                                  | <input type="radio"/> Yes <input type="radio"/> No                             |

|                                                                                                                                     |                                                    |
|-------------------------------------------------------------------------------------------------------------------------------------|----------------------------------------------------|
| Is there has available planting materials?                                                                                          | <input type="radio"/> Yes <input type="radio"/> No |
| Do you have enough homestead land for planting MPs?                                                                                 | <input type="radio"/> Yes <input type="radio"/> No |
| Are there enough promoting activities about the use of herbal medicine?                                                             | <input type="radio"/> Yes <input type="radio"/> No |
| Is there any Forest department policy about the collection/cultivation of MPs?                                                      | <input type="radio"/> Yes <input type="radio"/> No |
| Is there any policy to conserve MPs in the forest?                                                                                  | <input type="radio"/> Yes <input type="radio"/> No |
| Do you think introducing alien species in the plantation and reforestation treats for MPs?                                          | <input type="radio"/> Yes <input type="radio"/> No |
| Is there any organizing marketing system for MPs?                                                                                   | <input type="radio"/> Yes <input type="radio"/> No |
| Do you think MP has high demand across the country?                                                                                 | <input type="radio"/> Yes <input type="radio"/> No |
| Is there any herbal doctors recognized by the government?                                                                           | <input type="radio"/> Yes <input type="radio"/> No |
| Is there any formal education on MP-based herbal physicians?                                                                        | <input type="radio"/> Yes <input type="radio"/> No |
| “Less-educated people have engaged as practitioners like Kobiraj” - Do you think it is a threat?                                    | <input type="radio"/> Yes <input type="radio"/> No |
| Do you think deforestation is a cause for losing medicinal plant species?                                                           | <input type="radio"/> Yes <input type="radio"/> No |
| In our school book, is there any lesson about the use of medicinal plants?                                                          | <input type="radio"/> Yes <input type="radio"/> No |
| How much are you aware of the efficacy of MPs?                                                                                      | <input type="radio"/> Yes <input type="radio"/> No |
| “Less media focus is one of the reasons to reduce the use of herbal medicine” - is it true?                                         | <input type="radio"/> Yes <input type="radio"/> No |
| “Less care is required most of the wild MPs” - is it true?                                                                          | <input type="radio"/> Yes <input type="radio"/> No |
| Do you think less knowledge transmission from generation to generation is one of the causes of reducing the use of herbal medicine? | <input type="radio"/> Yes <input type="radio"/> No |
| “Less capital requires to start MPs business” – is it true?                                                                         | <input type="radio"/> Yes <input type="radio"/> No |
| Do you know about the export facilities of medicinal plants ( herbal medicine)?                                                     | <input type="radio"/> Yes <input type="radio"/> No |
